# Supplementary material
Source: PubMed Central journal article supplement (PMC8504535)

Supplemental Figure 1. Forest plot demonstrating hazard ratios from *univariable* analysis of factors associated with overall survival from time of LM diagnosis.

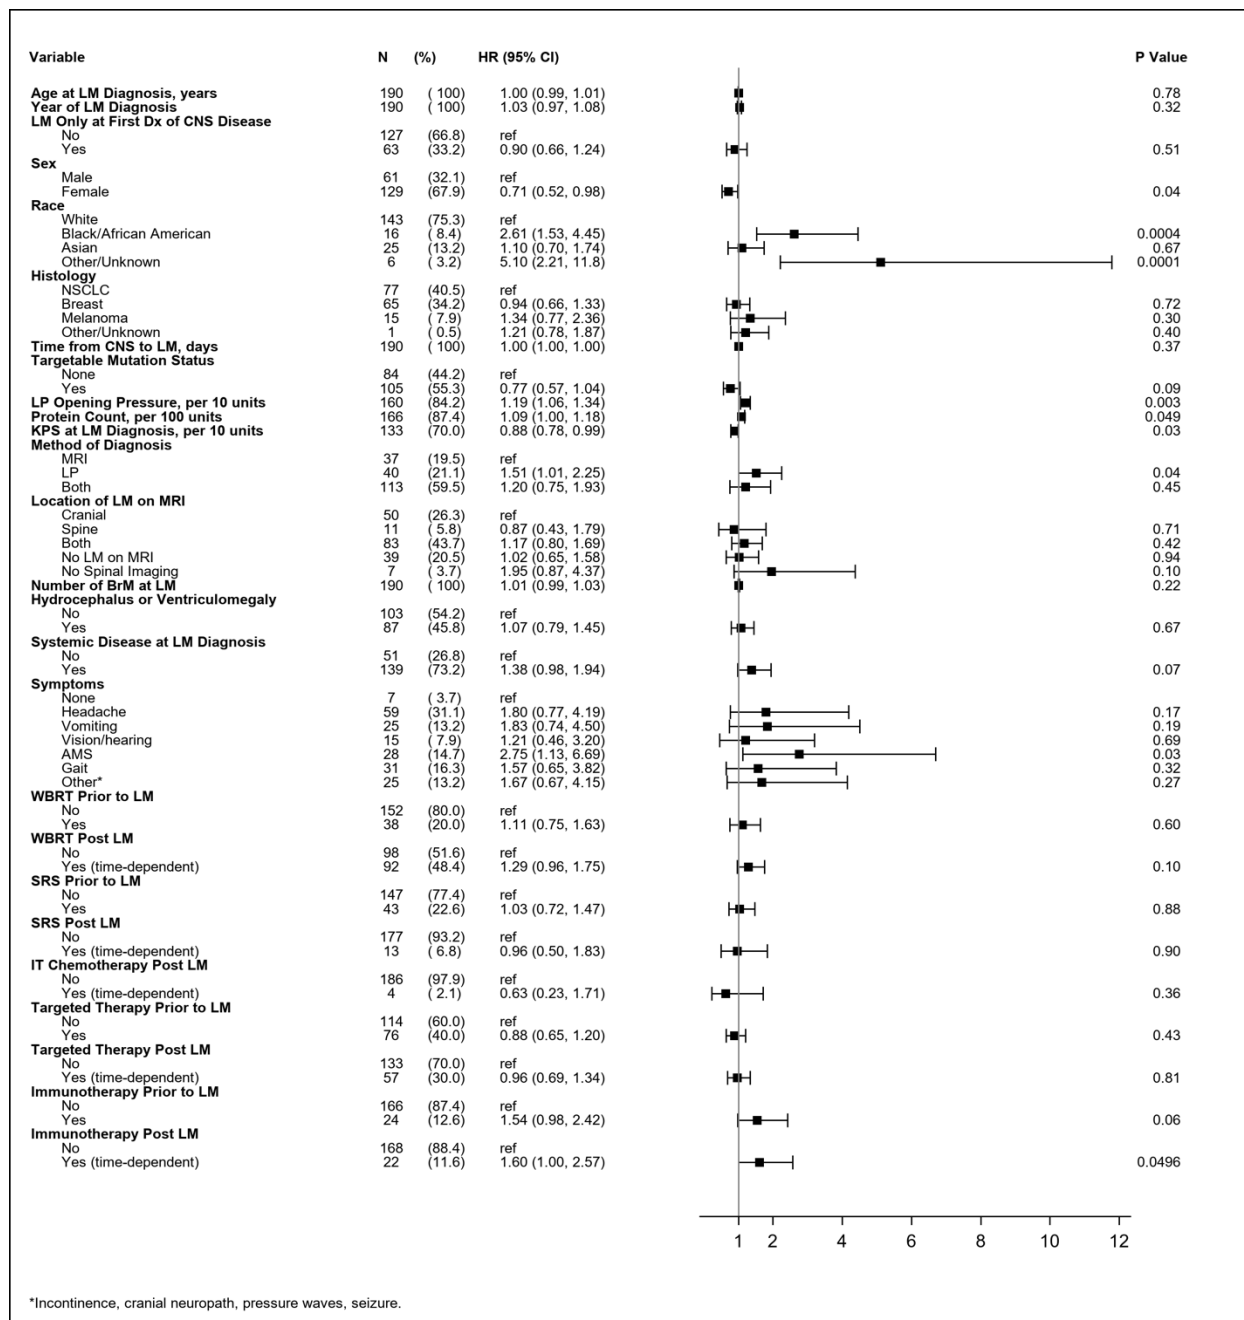

Supplemental Figure 2. Forest plot demonstrating hazard ratios from *univariable* analysis of survival from time of shunt placement

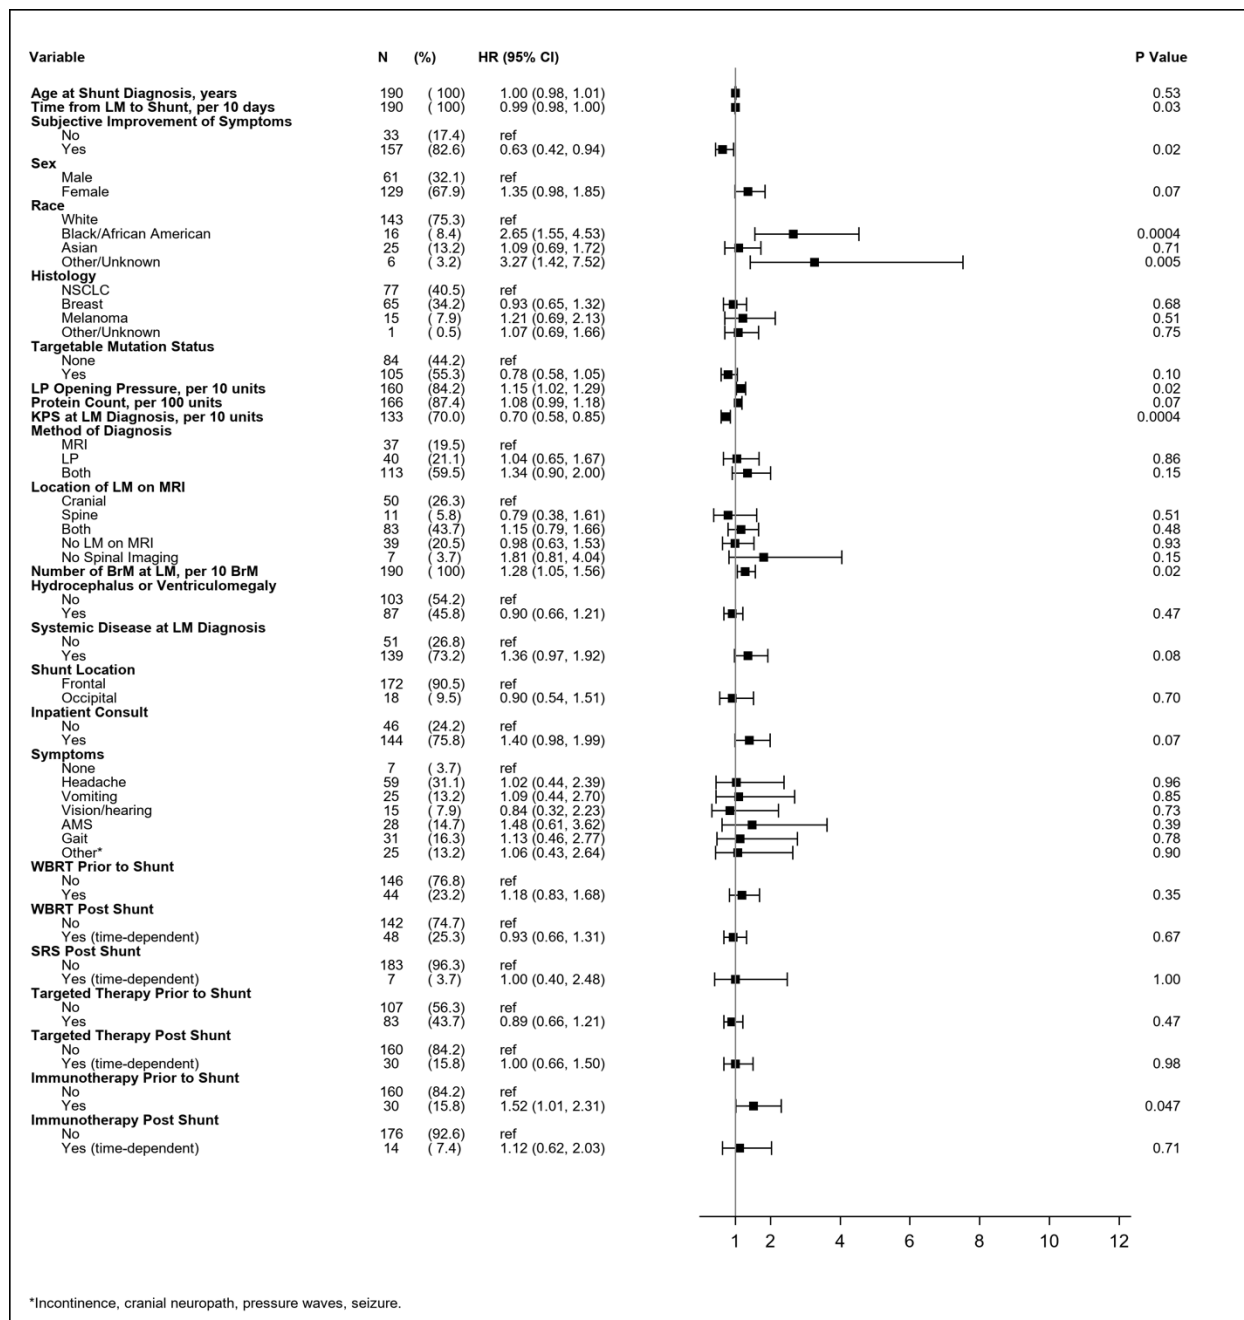

Supplement: NIHMS1745099-supplement-1745099_Sup_material.pdf [file NIHMS1745099-supplement-1745099_Sup_material.pdf]
